# Supplementary material for: Rapid and on-site analysis of illegal drugs on the nano–microscale using a deep ultraviolet-visible reflected optical fiber sensor
Source: Royal Society of Chemistry journal article supplement (doi:10.1039/c2an15953h), 2012-01-01
Supplement: c2an15953h.pdf [file c2an15953h.pdf]

## Supplementary Data

# Rapid and On-site Analysis of Illegal Drugs on the Nano-Microscale Using a Deep Ultraviolet–Visible Reflected Optical Fiber Sensor

Qiang Li, Tian Qiu, Hongxia Hao, Hong Zhou, Tongzhou Wang, Ye Zhang, Xin Li,  
Guoliang Huang, Jing Cheng

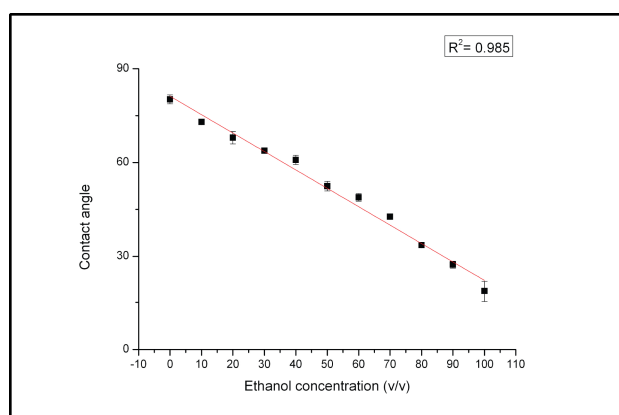

**Figure S1. Contact angle of ethanol solutions to quartz glass with different concentrations.** The contact angle decreased linearly as the ethanol concentration was increased.

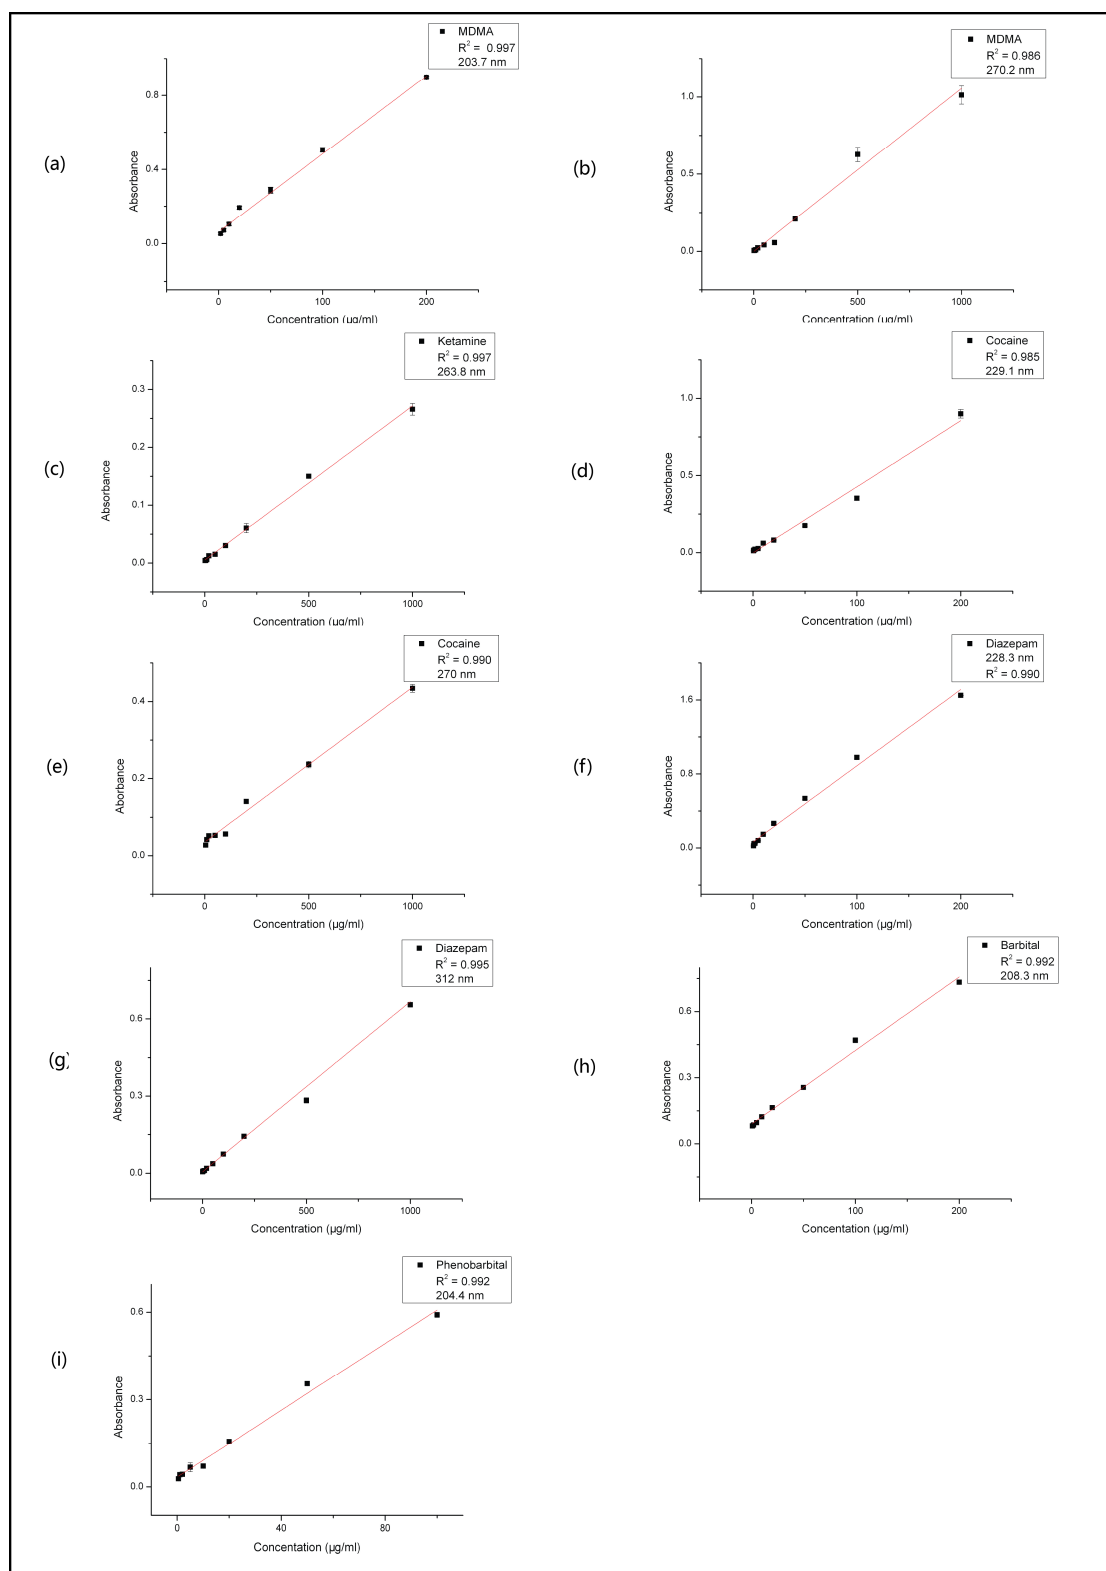

**Figure S2. The linear response of each drug based on its specific absorbance peak. (a) MDMA at 203.7 nm; (b) MDMA at 270.2 nm; (c) ketamine at 263.8 nm; (d) cocaine at 229.1 nm; (e) cocaine at 270.0 nm; (f) diazepam at 228.3 nm; (g) diazepam at 312.0 nm; (h) barbitol at 208.3 nm; (i) phenobarbital at 204.4 nm.**
